# Supplementary material
Source: PubMed Central journal article supplement (PMC6084746)
Supplement: zsw019_suppl_table_s1.pdf [file zsw019_suppl_table_s1.pdf]

**Table S1.** List of differentially expressed genes in circulating leukocytes of 11 monozygotic twin pairs with discordant sleep durations. Up-regulated genes in shorter sleep duration are highlighted in magenta, and down-regulated genes in short sleep twin pair is highlighted in cyan. A combined criteria of an FDR < 0.01 and  $|\log_2[\text{expression ratio}]| \geq 0.322$  ( $\pm 1.25$ -fold) was used to define statistically significant differential expression between short vs. long sleep duration groups.

| Gene Symbol  | Entrez ID | Log <sub>2</sub> [Short/Long] | P-Value  | FDR      |
|--------------|-----------|-------------------------------|----------|----------|
| LOC651436    | 651436    | 1.282                         | 1.18E-05 | 1.62E-03 |
| RPL9         | 6133      | 1.275                         | 1.84E-05 | 1.79E-03 |
| LOC389404    | 389404    | 1.271                         | 3.53E-06 | 1.27E-03 |
| RPS3A        | 6189      | 1.150                         | 1.13E-06 | 1.07E-03 |
| RPS3A        | 6189      | 1.116                         | 3.23E-06 | 1.22E-03 |
| RPS3A        | 6189      | 1.110                         | 1.84E-05 | 1.79E-03 |
| RPL17        | 6139      | 1.053                         | 1.84E-05 | 1.79E-03 |
| LOC100132742 | 100132742 | 1.024                         | 2.53E-05 | 2.10E-03 |
| RPL17        | 6139      | 1.018                         | 9.29E-06 | 1.57E-03 |
| LOC643863    | 643863    | 0.989                         | 2.58E-05 | 2.10E-03 |
| LOC646819    | 646819    | 0.985                         | 5.44E-04 | 7.90E-03 |
| LOC645296    | 645296    | 0.975                         | 1.95E-05 | 1.86E-03 |
| LOC727865    | 727865    | 0.966                         | 9.55E-06 | 1.57E-03 |
| CLC          | 1178      | 0.958                         | 5.03E-04 | 7.67E-03 |
| LOC642250    | 642250    | 0.950                         | 3.27E-05 | 2.30E-03 |
| LOC100133931 | 100133931 | 0.945                         | 2.88E-05 | 2.18E-03 |
| RSL24D1      | 51187     | 0.899                         | 1.11E-05 | 1.57E-03 |
| LOC391656    | 391656    | 0.883                         | 8.23E-04 | 9.69E-03 |
| LOC100131387 | 100131387 | 0.879                         | 1.69E-04 | 4.50E-03 |
| LOC644315    | 644315    | 0.878                         | 1.47E-06 | 1.07E-03 |
| LOC100129742 | 100129742 | 0.867                         | 5.56E-06 | 1.42E-03 |
| RPL31        | 6160      | 0.843                         | 3.17E-04 | 6.02E-03 |
| LOC100132742 | 100132742 | 0.840                         | 5.75E-05 | 2.74E-03 |
| LOC729301    | 729301    | 0.818                         | 1.60E-04 | 4.47E-03 |
| LOC389787    | 389787    | 0.811                         | 1.64E-05 | 1.79E-03 |
| RPL27        | 6155      | 0.801                         | 3.28E-04 | 6.06E-03 |
| RPL9         | 6133      | 0.798                         | 1.32E-04 | 4.09E-03 |
| HINT1        | 3094      | 0.795                         | 1.21E-04 | 3.84E-03 |
| COMMD6       | 170622    | 0.783                         | 4.89E-04 | 7.54E-03 |
| LOC727865    | 727865    | 0.773                         | 3.44E-05 | 2.32E-03 |
| LOC285741    | 285741    | 0.768                         | 3.20E-05 | 2.27E-03 |
| RGS18        | 64407     | 0.765                         | 2.30E-04 | 5.12E-03 |
| LOC100129379 | 100129379 | 0.749                         | 5.45E-04 | 7.90E-03 |
| ARGLU1       | 55082     | 0.744                         | 6.91E-05 | 3.04E-03 |
| ZRANB2       | 9406      | 0.743                         | 1.19E-04 | 3.81E-03 |
| CD52         | 1043      | 0.742                         | 5.68E-04 | 8.07E-03 |
| NDUFA4       | 4697      | 0.735                         | 7.66E-04 | 9.26E-03 |

|              |           |       |          |          |
|--------------|-----------|-------|----------|----------|
| RPL39        | 6170      | 0.728 | 4.04E-04 | 6.78E-03 |
| LOC650276    | 650276    | 0.720 | 4.84E-05 | 2.54E-03 |
| RPL23        | 9349      | 0.708 | 2.09E-04 | 4.86E-03 |
| MBNL1        | 4154      | 0.704 | 1.73E-04 | 4.50E-03 |
| FOXN2        | 3344      | 0.701 | 6.57E-04 | 8.66E-03 |
| LOC643284    | 643284    | 0.693 | 1.77E-04 | 4.50E-03 |
| LOC646785    | 646785    | 0.688 | 4.89E-05 | 2.54E-03 |
| LOC402057    | 402057    | 0.681 | 4.28E-04 | 7.02E-03 |
| TMEM123      | 114908    | 0.680 | 3.40E-04 | 6.12E-03 |
| LOC728973    | 728973    | 0.679 | 4.20E-05 | 2.42E-03 |
| LOC653226    | 653226    | 0.666 | 2.56E-04 | 5.38E-03 |
| SRP9         | 6726      | 0.662 | 4.10E-05 | 2.41E-03 |
| EEF1AL7      | 441032    | 0.658 | 1.32E-05 | 1.64E-03 |
| TRAM1        | 23471     | 0.656 | 7.17E-04 | 8.94E-03 |
| TPT1         | 7178      | 0.654 | 7.91E-04 | 9.42E-03 |
| AP1S2        | 8905      | 0.645 | 3.24E-04 | 6.05E-03 |
| PCNP         | 57092     | 0.644 | 3.32E-04 | 6.09E-03 |
| CAPZA2       | 830       | 0.640 | 4.42E-04 | 7.12E-03 |
| LEPROTL1     | 23484     | 0.633 | 4.30E-05 | 2.44E-03 |
| LOC730187    | 730187    | 0.631 | 2.58E-04 | 5.42E-03 |
| RPS18        | 6222      | 0.628 | 9.02E-05 | 3.44E-03 |
| C17ORF45     | 125144    | 0.623 | 4.43E-06 | 1.27E-03 |
| GZMK         | 3003      | 0.612 | 8.94E-05 | 3.44E-03 |
| EEF1B2       | 1933      | 0.610 | 3.38E-07 | 6.58E-04 |
| LOC648000    | 648000    | 0.609 | 8.15E-04 | 9.63E-03 |
| LOC728672    | 728672    | 0.606 | 4.00E-05 | 2.40E-03 |
| LOC647361    | 647361    | 0.605 | 8.48E-04 | 9.83E-03 |
| TMX1         | 81542     | 0.600 | 3.38E-04 | 6.10E-03 |
| LOC391833    | 391833    | 0.598 | 1.71E-04 | 4.50E-03 |
| EFR3A        | 23167     | 0.597 | 4.70E-04 | 7.33E-03 |
| LOC441073    | 441073    | 0.594 | 3.90E-05 | 2.40E-03 |
| LOC100131261 | 100131261 | 0.593 | 3.95E-05 | 2.40E-03 |
| RPS6P1       | 440086    | 0.588 | 2.12E-07 | 6.58E-04 |
| LOC653232    | 653232    | 0.582 | 2.25E-04 | 5.04E-03 |
| LOC645715    | 645715    | 0.578 | 9.01E-05 | 3.44E-03 |
| PSMA6        | 5687      | 0.578 | 1.10E-04 | 3.63E-03 |
| CLK1         | 1195      | 0.577 | 3.97E-05 | 2.40E-03 |
| LOC730255    | 730255    | 0.577 | 8.44E-04 | 9.81E-03 |
| RPLP0        | 6175      | 0.575 | 5.14E-06 | 1.39E-03 |
| CD48         | 962       | 0.573 | 2.53E-04 | 5.35E-03 |
| MATR3        | 9782      | 0.570 | 9.20E-05 | 3.44E-03 |
| LOC441506    | 441506    | 0.569 | 1.75E-04 | 4.50E-03 |
| LOC158345    | 158345    | 0.567 | 3.15E-07 | 6.58E-04 |
| RPL15        | 6138      | 0.567 | 5.92E-05 | 2.77E-03 |

|              |           |       |          |          |
|--------------|-----------|-------|----------|----------|
| PNRC2        | 55629     | 0.565 | 8.15E-05 | 3.33E-03 |
| LOC441246    | 441246    | 0.563 | 4.39E-04 | 7.08E-03 |
| LOC388339    | 388339    | 0.561 | 7.97E-05 | 3.31E-03 |
| LOC100131205 | 100131205 | 0.559 | 8.50E-05 | 3.39E-03 |
| CGGBP1       | 8545      | 0.557 | 2.09E-04 | 4.86E-03 |
| LOC728126    | 728126    | 0.557 | 1.76E-04 | 4.50E-03 |
| UQCRQ        | 27089     | 0.556 | 4.53E-04 | 7.19E-03 |
| TMEM126B     | 55863     | 0.556 | 1.25E-05 | 1.64E-03 |
| RPL30        | 6156      | 0.554 | 5.43E-04 | 7.90E-03 |
| BIRC3        | 330       | 0.551 | 2.83E-05 | 2.18E-03 |
| LOC402251    | 402251    | 0.551 | 6.25E-05 | 2.86E-03 |
| LOC646942    | 646942    | 0.548 | 7.39E-04 | 9.11E-03 |
| LOC646766    | 646766    | 0.547 | 5.11E-04 | 7.73E-03 |
| RPL5         | 6125      | 0.546 | 1.74E-05 | 1.79E-03 |
| LOC649049    | 649049    | 0.544 | 7.34E-05 | 3.16E-03 |
| LOC402694    | 402694    | 0.543 | 3.19E-04 | 6.02E-03 |
| EEF1A1       | 1915      | 0.543 | 1.03E-05 | 1.57E-03 |
| EVI2A        | 2123      | 0.541 | 7.56E-04 | 9.21E-03 |
| PRNP         | 5621      | 0.540 | 1.80E-04 | 4.55E-03 |
| LOC730754    | 730754    | 0.540 | 5.01E-05 | 2.56E-03 |
| LOC388654    | 388654    | 0.539 | 1.71E-05 | 1.79E-03 |
| LOC728590    | 728590    | 0.537 | 3.81E-06 | 1.27E-03 |
| LOC728576    | 728576    | 0.537 | 3.28E-04 | 6.06E-03 |
| CD47         | 961       | 0.533 | 5.18E-04 | 7.76E-03 |
| LOC391126    | 391126    | 0.531 | 3.49E-05 | 2.32E-03 |
| LEMD3        | 23592     | 0.528 | 2.09E-04 | 4.86E-03 |
| AZIN1        | 51582     | 0.528 | 2.11E-04 | 4.87E-03 |
| LOC401537    | 401537    | 0.528 | 2.49E-04 | 5.31E-03 |
| LOC644464    | 644464    | 0.527 | 1.35E-04 | 4.14E-03 |
| IL7R         | 3575      | 0.527 | 8.64E-06 | 1.57E-03 |
| REEP5        | 7905      | 0.525 | 1.67E-04 | 4.50E-03 |
| LOC649150    | 649150    | 0.523 | 1.81E-05 | 1.79E-03 |
| LOC388532    | 388532    | 0.519 | 6.35E-04 | 8.58E-03 |
| LOC647856    | 647856    | 0.517 | 5.62E-05 | 2.72E-03 |
| EIF4A2       | 1974      | 0.517 | 3.34E-04 | 6.09E-03 |
| GZMA         | 3001      | 0.515 | 5.34E-05 | 2.66E-03 |
| EEF1B2       | 1933      | 0.514 | 7.41E-06 | 1.52E-03 |
| RPL7         | 6129      | 0.513 | 4.16E-05 | 2.41E-03 |
| CRBN         | 51185     | 0.513 | 1.04E-04 | 3.63E-03 |
| ZBED5        | 58486     | 0.513 | 5.86E-04 | 8.21E-03 |
| LOC650369    | 650369    | 0.511 | 1.08E-05 | 1.57E-03 |
| LOC731640    | 731640    | 0.511 | 4.44E-04 | 7.12E-03 |
| DEK          | 7913      | 0.509 | 3.33E-04 | 6.09E-03 |
| HOPX         | 84525     | 0.508 | 2.56E-06 | 1.22E-03 |

|              |           |       |          |          |
|--------------|-----------|-------|----------|----------|
| LOC100127993 | 100127993 | 0.506 | 4.35E-04 | 7.06E-03 |
| PCMTD1       | 115294    | 0.503 | 6.43E-04 | 8.58E-03 |
| LOC645387    | 645387    | 0.501 | 1.11E-05 | 1.57E-03 |
| ZNHIT3       | 9326      | 0.501 | 2.68E-04 | 5.50E-03 |
| LOC387867    | 387867    | 0.501 | 5.10E-05 | 2.58E-03 |
| LOC730029    | 730029    | 0.497 | 1.82E-04 | 4.58E-03 |
| LOC100134504 | 100134504 | 0.497 | 1.11E-04 | 3.63E-03 |
| C19ORF2      | 8725      | 0.496 | 1.48E-05 | 1.73E-03 |
| CLNS1A       | 1207      | 0.495 | 1.56E-05 | 1.75E-03 |
| TOMM7        | 54543     | 0.494 | 4.05E-04 | 6.78E-03 |
| TMEM14C      | 51522     | 0.492 | 1.49E-04 | 4.31E-03 |
| LOC388621    | 388621    | 0.490 | 8.26E-04 | 9.71E-03 |
| SFRS2IP      | 9169      | 0.488 | 5.15E-04 | 7.76E-03 |
| LOC440737    | 440737    | 0.487 | 7.57E-04 | 9.21E-03 |
| MRFAP1L1     | 114932    | 0.486 | 2.07E-05 | 1.88E-03 |
| LOC653226    | 653226    | 0.485 | 2.61E-06 | 1.22E-03 |
| LOC285900    | 285900    | 0.484 | 1.10E-05 | 1.57E-03 |
| FAU          | 2197      | 0.482 | 3.67E-04 | 6.45E-03 |
| TOMM7        | 54543     | 0.480 | 2.19E-04 | 4.97E-03 |
| PPP1CC       | 5501      | 0.480 | 5.94E-04 | 8.28E-03 |
| LOC648249    | 648249    | 0.479 | 1.38E-04 | 4.15E-03 |
| TMEM50B      | 757       | 0.477 | 5.88E-06 | 1.43E-03 |
| ID2          | 3398      | 0.475 | 6.55E-05 | 2.96E-03 |
| C12ORF57     | 113246    | 0.472 | 1.47E-05 | 1.73E-03 |
| UBE2Q2       | 92912     | 0.472 | 2.92E-04 | 5.75E-03 |
| RPL4         | 6124      | 0.472 | 3.19E-05 | 2.27E-03 |
| LOC100132673 | 100132673 | 0.470 | 1.02E-05 | 1.57E-03 |
| BTAF1        | 9044      | 0.470 | 9.17E-05 | 3.44E-03 |
| LOC100128060 | 100128060 | 0.469 | 4.41E-05 | 2.45E-03 |
| ATM          | 472       | 0.467 | 5.61E-05 | 2.72E-03 |
| LOC651149    | 651149    | 0.466 | 2.43E-06 | 1.22E-03 |
| HMG4         | 10473     | 0.465 | 5.65E-05 | 2.72E-03 |
| EIF3E        | 3646      | 0.465 | 1.43E-06 | 1.07E-03 |
| FAM96A       | 84191     | 0.464 | 2.62E-04 | 5.46E-03 |
| EBI2         | 1880      | 0.463 | 7.59E-06 | 1.52E-03 |
| SERP1        | 27230     | 0.463 | 1.82E-05 | 1.79E-03 |
| RFX7         | 64864     | 0.463 | 1.53E-04 | 4.36E-03 |
| AKAP11       | 11215     | 0.462 | 7.05E-04 | 8.84E-03 |
| YWHAQ        | 10971     | 0.462 | 8.55E-06 | 1.57E-03 |
| LOC728782    | 728782    | 0.461 | 2.67E-04 | 5.50E-03 |
| MGC87895     | 644068    | 0.461 | 4.52E-06 | 1.27E-03 |
| LOC644511    | 644511    | 0.460 | 1.19E-04 | 3.81E-03 |
| MBNL1        | 4154      | 0.459 | 7.69E-04 | 9.26E-03 |
| RPL35A       | 6165      | 0.458 | 8.50E-04 | 9.85E-03 |

|              |           |       |          |          |
|--------------|-----------|-------|----------|----------|
| GIMAP2       | 26157     | 0.456 | 4.35E-04 | 7.06E-03 |
| LOC650518    | 650518    | 0.454 | 5.17E-04 | 7.76E-03 |
| LOC440595    | 440595    | 0.454 | 6.91E-04 | 8.76E-03 |
| PRKRIR       | 5612      | 0.453 | 7.70E-05 | 3.24E-03 |
| RPSA         | 3921      | 0.453 | 4.18E-04 | 6.90E-03 |
| C6ORF190     | 387357    | 0.450 | 2.89E-05 | 2.18E-03 |
| LOC642989    | 642989    | 0.450 | 2.35E-05 | 2.05E-03 |
| CCDC109B     | 55013     | 0.450 | 9.04E-05 | 3.44E-03 |
| CLINT1       | 9685      | 0.450 | 1.10E-04 | 3.63E-03 |
| LOC645157    | 645157    | 0.448 | 7.36E-04 | 9.09E-03 |
| PAIP2        | 51247     | 0.444 | 7.70E-04 | 9.26E-03 |
| C20ORF30     | 29058     | 0.444 | 2.62E-05 | 2.10E-03 |
| ARL5A        | 26225     | 0.443 | 6.86E-04 | 8.76E-03 |
| RPL26        | 6154      | 0.441 | 1.11E-04 | 3.63E-03 |
| THUMPD1      | 55623     | 0.439 | 7.93E-04 | 9.42E-03 |
| LOC388707    | 388707    | 0.439 | 2.61E-04 | 5.46E-03 |
| LOC641814    | 641814    | 0.438 | 1.02E-04 | 3.60E-03 |
| CHURC1       | 91612     | 0.438 | 2.42E-04 | 5.24E-03 |
| VPS36        | 51028     | 0.437 | 6.56E-04 | 8.66E-03 |
| EEF1A1       | 1915      | 0.436 | 3.31E-05 | 2.31E-03 |
| EBI2         | 1880      | 0.435 | 1.26E-05 | 1.64E-03 |
| KLRB1        | 3820      | 0.435 | 5.21E-04 | 7.76E-03 |
| HMG1         | 3150      | 0.434 | 8.76E-07 | 9.46E-04 |
| SLC4A7       | 9497      | 0.432 | 4.33E-05 | 2.44E-03 |
| LOC653737    | 653737    | 0.431 | 3.98E-04 | 6.74E-03 |
| HIST1H4C     | 8364      | 0.431 | 4.35E-05 | 2.44E-03 |
| LOC646483    | 646483    | 0.431 | 4.11E-05 | 2.41E-03 |
| OSTC         | 58505     | 0.430 | 1.07E-04 | 3.63E-03 |
| LOC100129141 | 100129141 | 0.429 | 5.49E-04 | 7.90E-03 |
| COMMD3       | 23412     | 0.428 | 1.03E-04 | 3.63E-03 |
| ACADM        | 34        | 0.428 | 1.91E-04 | 4.63E-03 |
| TMEM14B      | 81853     | 0.428 | 3.76E-05 | 2.36E-03 |
| BMI1         | 648       | 0.426 | 2.96E-04 | 5.81E-03 |
| LOC728576    | 728576    | 0.426 | 1.53E-04 | 4.36E-03 |
| NDUFB5       | 4711      | 0.425 | 1.29E-05 | 1.64E-03 |
| LOC644907    | 644907    | 0.425 | 3.81E-04 | 6.56E-03 |
| PPP1R2       | 5504      | 0.425 | 3.21E-04 | 6.02E-03 |
| RPL17        | 6139      | 0.423 | 4.31E-06 | 1.27E-03 |
| CD3D         | 915       | 0.422 | 5.49E-04 | 7.90E-03 |
| VBP1         | 7411      | 0.422 | 1.71E-04 | 4.50E-03 |
| SNRPD2       | 6633      | 0.422 | 3.44E-04 | 6.12E-03 |
| LOC729236    | 729236    | 0.422 | 3.91E-05 | 2.40E-03 |
| PDCD10       | 11235     | 0.421 | 3.26E-04 | 6.06E-03 |
| TAX1BP1      | 8887      | 0.421 | 1.70E-04 | 4.50E-03 |

|              |           |       |          |          |
|--------------|-----------|-------|----------|----------|
| ANGEL2       | 90806     | 0.420 | 1.81E-04 | 4.55E-03 |
| KLHDC2       | 23588     | 0.419 | 4.20E-06 | 1.27E-03 |
| RPS6         | 6194      | 0.419 | 1.54E-05 | 1.74E-03 |
| ITM2A        | 9452      | 0.418 | 1.47E-05 | 1.73E-03 |
| CD3D         | 915       | 0.418 | 1.49E-04 | 4.31E-03 |
| OSTC         | 58505     | 0.418 | 2.95E-06 | 1.22E-03 |
| SENP7        | 57337     | 0.416 | 4.22E-04 | 6.94E-03 |
| ZNF302       | 55900     | 0.416 | 5.17E-04 | 7.76E-03 |
| PRKAR1A      | 5573      | 0.416 | 6.41E-04 | 8.58E-03 |
| LOC644464    | 644464    | 0.414 | 8.01E-04 | 9.51E-03 |
| LOC100129657 | 100129657 | 0.412 | 1.74E-04 | 4.50E-03 |
| PSMD10       | 5716      | 0.412 | 3.58E-05 | 2.32E-03 |
| RSBN1        | 54665     | 0.412 | 7.56E-04 | 9.21E-03 |
| PCMT1        | 5110      | 0.412 | 6.85E-05 | 3.03E-03 |
| PTGER4       | 5734      | 0.412 | 1.04E-04 | 3.63E-03 |
| RPL13A       | 23521     | 0.411 | 9.48E-05 | 3.49E-03 |
| LOC100128936 | 100128936 | 0.410 | 5.63E-07 | 7.01E-04 |
| PSIP1        | 11168     | 0.409 | 5.46E-04 | 7.90E-03 |
| PIGY         | 84992     | 0.409 | 6.66E-04 | 8.68E-03 |
| PLEKHA1      | 59338     | 0.408 | 3.39E-05 | 2.31E-03 |
| KLF9         | 687       | 0.406 | 3.57E-05 | 2.32E-03 |
| LOC646688    | 646688    | 0.406 | 1.05E-04 | 3.63E-03 |
| P2RY5        | 10161     | 0.405 | 5.78E-04 | 8.13E-03 |
| LOC387825    | 387825    | 0.404 | 6.85E-06 | 1.52E-03 |
| ANXA1        | 301       | 0.404 | 2.83E-04 | 5.64E-03 |
| GOLGA8B      | 440270    | 0.403 | 1.67E-05 | 1.79E-03 |
| RASGRP1      | 10125     | 0.403 | 3.61E-05 | 2.32E-03 |
| LOC648210    | 648210    | 0.403 | 7.40E-05 | 3.17E-03 |
| SF3B1        | 23451     | 0.402 | 3.20E-04 | 6.02E-03 |
| AKAP7        | 9465      | 0.402 | 7.51E-05 | 3.19E-03 |
| RBX1         | 9978      | 0.402 | 7.71E-04 | 9.26E-03 |
| LOC642975    | 642975    | 0.401 | 2.70E-04 | 5.53E-03 |
| LOC100130892 | 100130892 | 0.401 | 7.21E-04 | 8.97E-03 |
| RPL13        | 6137      | 0.400 | 4.54E-05 | 2.49E-03 |
| LOC652624    | 652624    | 0.400 | 1.47E-04 | 4.29E-03 |
| ASNSD1       | 54529     | 0.399 | 1.01E-04 | 3.60E-03 |
| TMEM14D      | 645203    | 0.399 | 1.99E-04 | 4.76E-03 |
| PPP3CB       | 5532      | 0.399 | 1.01E-04 | 3.60E-03 |
| CLDND1       | 56650     | 0.398 | 3.14E-04 | 5.99E-03 |
| C13ORF15     | 28984     | 0.397 | 8.22E-05 | 3.33E-03 |
| MS4A7        | 58475     | 0.397 | 1.60E-04 | 4.47E-03 |
| LOC100128410 | 100128410 | 0.396 | 2.11E-04 | 4.86E-03 |
| ZNF800       | 168850    | 0.395 | 4.66E-05 | 2.50E-03 |
| RPS9         | 6203      | 0.394 | 5.60E-04 | 8.00E-03 |

|              |           |       |          |          |
|--------------|-----------|-------|----------|----------|
| TM2D1        | 83941     | 0.394 | 1.94E-04 | 4.68E-03 |
| ETS1         | 2113      | 0.394 | 6.95E-04 | 8.78E-03 |
| EFHA1        | 221154    | 0.393 | 4.02E-04 | 6.78E-03 |
| RPS14        | 6208      | 0.393 | 2.21E-05 | 1.97E-03 |
| LOC653232    | 653232    | 0.393 | 3.06E-04 | 5.90E-03 |
| LOC644604    | 644604    | 0.392 | 2.95E-04 | 5.80E-03 |
| BUB3         | 9184      | 0.391 | 1.19E-04 | 3.81E-03 |
| PPIL3        | 53938     | 0.391 | 9.68E-05 | 3.52E-03 |
| TMED2        | 10959     | 0.391 | 8.53E-04 | 9.85E-03 |
| LOC647030    | 647030    | 0.390 | 2.53E-04 | 5.35E-03 |
| CRLS1        | 54675     | 0.390 | 1.70E-04 | 4.50E-03 |
| PTMA         | 5757      | 0.389 | 6.44E-04 | 8.58E-03 |
| LOC339970    | 339970    | 0.386 | 5.95E-04 | 8.28E-03 |
| LSM1         | 27257     | 0.386 | 3.41E-04 | 6.12E-03 |
| RPL13L       | 283345    | 0.386 | 9.37E-06 | 1.57E-03 |
| PTPLB        | 201562    | 0.385 | 6.13E-04 | 8.42E-03 |
| SNRPF        | 6636      | 0.384 | 2.58E-05 | 2.10E-03 |
| C2ORF64      | 493753    | 0.384 | 2.45E-05 | 2.10E-03 |
| BRP44L       | 51660     | 0.384 | 6.10E-04 | 8.40E-03 |
| RAB11A       | 8766      | 0.382 | 4.49E-04 | 7.16E-03 |
| RPL6         | 6128      | 0.381 | 2.54E-04 | 5.35E-03 |
| DBI          | 1622      | 0.381 | 2.22E-04 | 5.02E-03 |
| SET          | 6418      | 0.380 | 1.15E-04 | 3.71E-03 |
| LOC729926    | 729926    | 0.379 | 4.41E-05 | 2.45E-03 |
| ARL6IP1      | 23204     | 0.379 | 6.05E-04 | 8.36E-03 |
| CROP         | 51747     | 0.378 | 7.90E-05 | 3.29E-03 |
| ZNF22        | 7570      | 0.378 | 1.10E-04 | 3.63E-03 |
| OGT          | 8473      | 0.377 | 4.93E-05 | 2.54E-03 |
| FAM60A       | 58516     | 0.376 | 3.46E-04 | 6.14E-03 |
| SNHG6        | 641638    | 0.375 | 4.37E-04 | 7.06E-03 |
| ETS1         | 2113      | 0.375 | 5.33E-04 | 7.87E-03 |
| DDX3X        | 1654      | 0.374 | 8.60E-04 | 9.92E-03 |
| CMPK1        | 51727     | 0.374 | 9.11E-05 | 3.44E-03 |
| KLF12        | 11278     | 0.373 | 1.06E-04 | 3.63E-03 |
| C18ORF25     | 147339    | 0.372 | 7.82E-04 | 9.35E-03 |
| LOC100130553 | 100130553 | 0.372 | 3.06E-04 | 5.90E-03 |
| TROVE2       | 6738      | 0.372 | 1.65E-04 | 4.47E-03 |
| GNA13        | 10672     | 0.371 | 5.69E-04 | 8.07E-03 |
| ZBTB33       | 10009     | 0.371 | 3.97E-04 | 6.74E-03 |
| CLDND1       | 56650     | 0.371 | 5.48E-04 | 7.90E-03 |
| LOC646688    | 646688    | 0.370 | 4.65E-04 | 7.29E-03 |
| PQLC3        | 130814    | 0.370 | 8.80E-05 | 3.44E-03 |
| NKTR         | 4820      | 0.369 | 3.17E-04 | 6.02E-03 |
| WWP1         | 11059     | 0.369 | 4.63E-05 | 2.50E-03 |

|              |           |       |          |          |
|--------------|-----------|-------|----------|----------|
| TMEM181      | 57583     | 0.369 | 7.72E-05 | 3.24E-03 |
| COX7A2L      | 9167      | 0.369 | 2.83E-04 | 5.64E-03 |
| ITK          | 3702      | 0.368 | 4.20E-04 | 6.92E-03 |
| ZMYND11      | 10771     | 0.367 | 8.58E-06 | 1.57E-03 |
| SLC35A1      | 10559     | 0.366 | 6.66E-04 | 8.68E-03 |
| CLN5         | 1203      | 0.366 | 3.76E-04 | 6.53E-03 |
| RPS14        | 6208      | 0.365 | 2.64E-04 | 5.48E-03 |
| C1ORF19      | 116461    | 0.365 | 3.52E-05 | 2.32E-03 |
| MCEE         | 84693     | 0.365 | 4.65E-05 | 2.50E-03 |
| CLK1         | 1195      | 0.364 | 5.06E-04 | 7.68E-03 |
| TMEM41B      | 440026    | 0.364 | 5.96E-04 | 8.28E-03 |
| ZNF22        | 7570      | 0.362 | 1.38E-04 | 4.15E-03 |
| MRPL32       | 64983     | 0.362 | 1.74E-05 | 1.79E-03 |
| SP4          | 6671      | 0.361 | 2.45E-05 | 2.10E-03 |
| MORF4L1      | 10933     | 0.361 | 1.57E-04 | 4.43E-03 |
| SS18L2       | 51188     | 0.360 | 2.00E-04 | 4.77E-03 |
| C16ORF63     | 123811    | 0.360 | 2.82E-04 | 5.64E-03 |
| LOC100129553 | 100129553 | 0.359 | 8.19E-05 | 3.33E-03 |
| LOC728658    | 728658    | 0.359 | 1.36E-04 | 4.15E-03 |
| PSMA6        | 5687      | 0.358 | 1.53E-05 | 1.74E-03 |
| MKKS         | 8195      | 0.358 | 2.81E-04 | 5.64E-03 |
| TINP1        | 10412     | 0.356 | 2.72E-05 | 2.15E-03 |
| C19ORF12     | 83636     | 0.356 | 5.61E-04 | 8.00E-03 |
| ATM          | 472       | 0.356 | 4.51E-04 | 7.16E-03 |
| RPS5         | 6193      | 0.352 | 3.74E-04 | 6.52E-03 |
| CROP         | 51747     | 0.352 | 5.51E-04 | 7.90E-03 |
| LOC729208    | 729208    | 0.352 | 4.51E-04 | 7.16E-03 |
| RPS8         | 6202      | 0.352 | 5.75E-04 | 8.11E-03 |
| LOC100132715 | 100132715 | 0.351 | 1.30E-04 | 4.05E-03 |
| C6ORF48      | 50854     | 0.350 | 3.87E-04 | 6.61E-03 |
| SFRS10       | 6434      | 0.350 | 2.34E-04 | 5.14E-03 |
| ELF1         | 1997      | 0.346 | 7.44E-04 | 9.14E-03 |
| TIA1         | 7072      | 0.343 | 3.01E-04 | 5.85E-03 |
| ATP5J        | 522       | 0.343 | 7.52E-04 | 9.21E-03 |
| DIMT1L       | 27292     | 0.342 | 3.75E-04 | 6.52E-03 |
| RWDD1        | 51389     | 0.342 | 4.63E-04 | 7.28E-03 |
| CUL5         | 8065      | 0.342 | 2.34E-04 | 5.14E-03 |
| CEPT1        | 10390     | 0.342 | 4.64E-04 | 7.28E-03 |
| ARL5A        | 26225     | 0.342 | 5.01E-04 | 7.67E-03 |
| LOC642828    | 642828    | 0.341 | 1.74E-04 | 4.50E-03 |
| LOC644363    | 644363    | 0.341 | 5.95E-04 | 8.28E-03 |
| CUL4A        | 8451      | 0.340 | 8.51E-05 | 3.39E-03 |
| LOC645173    | 645173    | 0.339 | 5.06E-05 | 2.57E-03 |
| KIAA1712     | 80817     | 0.336 | 6.87E-04 | 8.76E-03 |



|           |        |        |          |          |
|-----------|--------|--------|----------|----------|
| SFRS2     | 6427   | 0.336  | 1.14E-04 | 3.71E-03 |
| CNBP      | 7555   | 0.335  | 4.17E-05 | 2.41E-03 |
| RPL10A    | 4736   | 0.335  | 1.76E-04 | 4.50E-03 |
| COX6C     | 1345   | 0.335  | 5.76E-05 | 2.74E-03 |
| PTPN22    | 26191  | 0.334  | 6.90E-04 | 8.76E-03 |
| CHMP5     | 51510  | 0.334  | 7.66E-04 | 9.26E-03 |
| LPIN1     | 23175  | 0.333  | 3.58E-05 | 2.32E-03 |
| RPS13     | 6207   | 0.332  | 4.04E-04 | 6.78E-03 |
| CNIH      | 10175  | 0.332  | 4.79E-04 | 7.46E-03 |
| ACTR2     | 10097  | 0.331  | 3.66E-04 | 6.44E-03 |
| CNOT7     | 29883  | 0.330  | 1.85E-04 | 4.58E-03 |
| MKI67IP   | 84365  | 0.330  | 2.89E-05 | 2.18E-03 |
| TMEM209   | 84928  | 0.329  | 6.41E-04 | 8.58E-03 |
| KLRF1     | 51348  | 0.328  | 3.32E-04 | 6.09E-03 |
| FNTA      | 2339   | 0.324  | 3.42E-04 | 6.12E-03 |
| LOC389156 | 389156 | 0.323  | 3.53E-04 | 6.24E-03 |
| DNAJB14   | 79982  | 0.322  | 2.10E-04 | 4.86E-03 |
| C7ORF23   | 79161  | 0.321  | 7.00E-04 | 8.82E-03 |
| LOC388076 | 388076 | 0.318  | 3.03E-04 | 5.87E-03 |
| CEBPZ     | 10153  | 0.313  | 1.35E-04 | 4.14E-03 |
| SNHG5     | 387066 | 0.302  | 6.49E-04 | 8.62E-03 |
| MMP9      | 4318   | -0.834 | 2.64E-08 | 2.57E-04 |
| DYSF      | 8291   | -0.797 | 2.68E-07 | 6.58E-04 |
| ZYX       | 7791   | -0.628 | 5.77E-07 | 7.01E-04 |
| PGLYRP1   | 8993   | -0.628 | 3.93E-05 | 2.40E-03 |
| SPI1      | 6688   | -0.623 | 2.74E-06 | 1.22E-03 |
| BASP1     | 10409  | -0.618 | 5.50E-06 | 1.42E-03 |
| ALPL      | 249    | -0.588 | 2.04E-04 | 4.81E-03 |
| FAM129A   | 116496 | -0.580 | 2.17E-04 | 4.96E-03 |
| SEMA4A    | 64218  | -0.574 | 3.28E-06 | 1.22E-03 |
| RNF24     | 11237  | -0.573 | 2.01E-04 | 4.77E-03 |
| ANPEP     | 290    | -0.549 | 4.81E-07 | 7.01E-04 |
| LOC729021 | 729021 | -0.549 | 9.75E-06 | 1.57E-03 |
| CRISPLD2  | 83716  | -0.548 | 2.04E-06 | 1.22E-03 |
| LOC730286 | 730286 | -0.541 | 6.80E-05 | 3.02E-03 |
| CXCR1     | 3577   | -0.538 | 1.62E-05 | 1.79E-03 |
| C15ORF39  | 56905  | -0.513 | 5.80E-05 | 2.75E-03 |
| LOC643313 | 643313 | -0.506 | 2.17E-05 | 1.95E-03 |
| SPI1      | 6688   | -0.504 | 4.66E-05 | 2.50E-03 |
| MYO1F     | 4542   | -0.497 | 1.33E-05 | 1.64E-03 |
| SORL1     | 6653   | -0.494 | 1.09E-04 | 3.63E-03 |
| MED25     | 81857  | -0.494 | 7.50E-05 | 3.19E-03 |
| SEMA3E    | 9723   | -0.492 | 3.39E-04 | 6.12E-03 |
| FKBP14    | 55033  | -0.491 | 6.90E-04 | 8.76E-03 |

|              |           |        |          |          |
|--------------|-----------|--------|----------|----------|
| IL8RB        | 3579      | -0.489 | 1.10E-05 | 1.57E-03 |
| LILRA6       | 79168     | -0.487 | 2.23E-06 | 1.22E-03 |
| TYMP         | 1890      | -0.485 | 9.74E-05 | 3.53E-03 |
| LOC730284    | 730284    | -0.479 | 1.07E-04 | 3.63E-03 |
| KIAA1324     | 57535     | -0.478 | 1.00E-05 | 1.57E-03 |
| FFAR2        | 2867      | -0.476 | 6.75E-04 | 8.72E-03 |
| SORL1        | 6653      | -0.469 | 5.73E-06 | 1.43E-03 |
| LPAR2        | 9170      | -0.469 | 8.49E-05 | 3.39E-03 |
| WAS          | 7454      | -0.468 | 2.57E-05 | 2.10E-03 |
| SERPINA1     | 5265      | -0.465 | 1.20E-05 | 1.62E-03 |
| ACTN1        | 87        | -0.464 | 2.67E-06 | 1.22E-03 |
| LOC100132112 | 100132112 | -0.463 | 3.69E-05 | 2.34E-03 |
| MMP25        | 64386     | -0.456 | 4.36E-04 | 7.06E-03 |
| LOC100134634 | 100134634 | -0.456 | 5.95E-05 | 2.77E-03 |
| PRAM1        | 84106     | -0.455 | 2.80E-06 | 1.22E-03 |
| CYP4F3       | 4051      | -0.455 | 3.94E-06 | 1.27E-03 |
| ARAP3        | 64411     | -0.454 | 2.04E-05 | 1.88E-03 |
| PDLIM7       | 9260      | -0.451 | 3.40E-05 | 2.31E-03 |
| STK40        | 83931     | -0.450 | 8.36E-05 | 3.37E-03 |
| ITGAX        | 3687      | -0.445 | 4.94E-05 | 2.54E-03 |
| C16ORF57     | 79650     | -0.442 | 3.18E-05 | 2.27E-03 |
| UBN1         | 29855     | -0.440 | 2.97E-05 | 2.22E-03 |
| LILRB3       | 11025     | -0.439 | 1.48E-04 | 4.30E-03 |
| BCL3         | 602       | -0.437 | 1.51E-04 | 4.32E-03 |
| CREB5        | 9586      | -0.436 | 1.36E-04 | 4.15E-03 |
| SERPINA1     | 5265      | -0.436 | 7.56E-06 | 1.52E-03 |
| NCF1C        | 654817    | -0.435 | 2.59E-05 | 2.10E-03 |
| ECGF1        | 1890      | -0.434 | 5.12E-05 | 2.58E-03 |
| COTL1        | 23406     | -0.433 | 4.93E-04 | 7.58E-03 |
| RHOG         | 391       | -0.432 | 1.39E-06 | 1.07E-03 |
| IGF2R        | 3482      | -0.431 | 3.20E-06 | 1.22E-03 |
| LBA1         | 9881      | -0.431 | 1.64E-04 | 4.47E-03 |
| SIGLEC5      | 8778      | -0.429 | 9.38E-06 | 1.57E-03 |
| LYN          | 4067      | -0.428 | 2.46E-04 | 5.29E-03 |
| LOC730278    | 730278    | -0.423 | 2.66E-05 | 2.12E-03 |
| ZYX          | 7791      | -0.423 | 1.63E-04 | 4.47E-03 |
| PAK2         | 5062      | -0.422 | 2.59E-04 | 5.43E-03 |
| HLX          | 3142      | -0.422 | 4.57E-06 | 1.27E-03 |
| LOC441124    | 441124    | -0.421 | 1.85E-04 | 4.58E-03 |
| LOC728417    | 728417    | -0.419 | 1.43E-05 | 1.73E-03 |
| FPR1         | 2357      | -0.419 | 5.46E-05 | 2.69E-03 |
| C10RF24      | 116496    | -0.418 | 3.79E-05 | 2.36E-03 |
| PLCB2        | 5330      | -0.418 | 1.45E-04 | 4.28E-03 |
| LOC100130914 | 100130914 | -0.416 | 1.81E-04 | 4.55E-03 |

|              |           |        |          |          |
|--------------|-----------|--------|----------|----------|
| GRN          | 2896      | -0.414 | 1.38E-04 | 4.15E-03 |
| IL17RA       | 23765     | -0.412 | 8.53E-04 | 9.85E-03 |
| GRN          | 2896      | -0.411 | 3.36E-04 | 6.10E-03 |
| LRP10        | 26020     | -0.411 | 8.98E-06 | 1.57E-03 |
| TLN1         | 7094      | -0.410 | 3.33E-05 | 2.31E-03 |
| MBD6         | 114785    | -0.410 | 2.82E-05 | 2.18E-03 |
| CD97         | 976       | -0.410 | 1.65E-04 | 4.47E-03 |
| NBEAL2       | 23218     | -0.409 | 4.55E-06 | 1.27E-03 |
| TYMP         | 1890      | -0.405 | 1.26E-04 | 3.97E-03 |
| NCF4         | 4689      | -0.404 | 7.41E-06 | 1.52E-03 |
| CSF3R        | 1441      | -0.403 | 6.64E-04 | 8.68E-03 |
| TNIP1        | 10318     | -0.402 | 6.00E-05 | 2.78E-03 |
| LOC641710    | 641710    | -0.402 | 1.92E-05 | 1.85E-03 |
| UBA1         | 7317      | -0.401 | 1.80E-05 | 1.79E-03 |
| LOC284757    | 284757    | -0.401 | 2.03E-05 | 1.88E-03 |
| CD14         | 929       | -0.401 | 6.72E-06 | 1.52E-03 |
| SHKBP1       | 92799     | -0.399 | 1.33E-05 | 1.64E-03 |
| C5AR1        | 728       | -0.399 | 1.97E-05 | 1.86E-03 |
| LOC653158    | 653158    | -0.399 | 1.62E-04 | 4.47E-03 |
| LOC441268    | 441268    | -0.397 | 2.33E-05 | 2.05E-03 |
| LOC100134530 | 100134530 | -0.397 | 6.07E-04 | 8.37E-03 |
| C9ORF164     | 349236    | -0.397 | 7.23E-05 | 3.14E-03 |
| MVP          | 9961      | -0.397 | 7.64E-06 | 1.52E-03 |
| ABTB1        | 80325     | -0.396 | 1.63E-04 | 4.47E-03 |
| LOC728417    | 728417    | -0.396 | 6.81E-05 | 3.02E-03 |
| WBP2         | 23558     | -0.396 | 3.35E-04 | 6.10E-03 |
| MX2          | 4600      | -0.396 | 3.37E-04 | 6.10E-03 |
| ZNFX1        | 57169     | -0.396 | 2.86E-04 | 5.69E-03 |
| KIAA1751     | 85452     | -0.394 | 5.47E-04 | 7.90E-03 |
| HSPA1A       | 3303      | -0.393 | 6.72E-05 | 3.02E-03 |
| MAPK3        | 5595      | -0.393 | 8.19E-05 | 3.33E-03 |
| TGM3         | 7053      | -0.392 | 4.81E-05 | 2.54E-03 |
| STXBP2       | 6813      | -0.390 | 2.31E-04 | 5.12E-03 |
| CDA          | 978       | -0.389 | 2.54E-05 | 2.10E-03 |
| TKT          | 7086      | -0.388 | 1.31E-05 | 1.64E-03 |
| APBB1IP      | 54518     | -0.388 | 4.03E-04 | 6.78E-03 |
| LITAF        | 9516      | -0.385 | 6.03E-05 | 2.78E-03 |
| LMOD3        | 56203     | -0.382 | 1.55E-04 | 4.38E-03 |
| LOC100170939 | 100170939 | -0.382 | 4.20E-04 | 6.92E-03 |
| C21ORF24     | 400866    | -0.381 | 2.87E-04 | 5.69E-03 |
| MME          | 4311      | -0.380 | 5.51E-05 | 2.70E-03 |
| ARID3A       | 1820      | -0.380 | 5.34E-05 | 2.66E-03 |
| ANXA11       | 311       | -0.379 | 7.69E-04 | 9.26E-03 |
| EHBP1L1      | 254102    | -0.379 | 1.02E-04 | 3.60E-03 |

|              |           |        |          |          |
|--------------|-----------|--------|----------|----------|
| TIMP2        | 7077      | -0.377 | 7.92E-04 | 9.42E-03 |
| MAP1S        | 55201     | -0.376 | 5.56E-04 | 7.97E-03 |
| LRAP         | 64167     | -0.376 | 8.66E-04 | 9.94E-03 |
| MYADM        | 91663     | -0.375 | 9.28E-05 | 3.45E-03 |
| MAST3        | 23031     | -0.375 | 4.94E-05 | 2.54E-03 |
| VASP         | 7408      | -0.374 | 5.86E-05 | 2.76E-03 |
| ANKRD13D     | 338692    | -0.374 | 5.24E-04 | 7.78E-03 |
| FLOT2        | 2319      | -0.373 | 9.18E-05 | 3.44E-03 |
| SYK          | 6850      | -0.371 | 4.46E-04 | 7.13E-03 |
| PANX2        | 56666     | -0.369 | 3.09E-05 | 2.26E-03 |
| RBCK1        | 10616     | -0.369 | 9.90E-06 | 1.57E-03 |
| YPEL3        | 83719     | -0.369 | 5.05E-04 | 7.68E-03 |
| PAK1         | 5058      | -0.368 | 1.54E-06 | 1.07E-03 |
| GMIP         | 51291     | -0.368 | 1.01E-04 | 3.60E-03 |
| MTMR3        | 8897      | -0.368 | 3.15E-05 | 2.27E-03 |
| MBOAT7       | 79143     | -0.366 | 1.74E-04 | 4.50E-03 |
| ACTN4        | 81        | -0.366 | 1.71E-04 | 4.50E-03 |
| EMR3         | 84658     | -0.364 | 6.55E-05 | 2.96E-03 |
| RNF19B       | 127544    | -0.364 | 6.26E-04 | 8.52E-03 |
| SLC15A3      | 51296     | -0.364 | 6.82E-05 | 3.02E-03 |
| S100A11      | 6282      | -0.363 | 1.42E-04 | 4.23E-03 |
| BCL6         | 604       | -0.362 | 5.92E-04 | 8.28E-03 |
| PRKD2        | 25865     | -0.361 | 7.15E-04 | 8.94E-03 |
| POLR2A       | 5430      | -0.361 | 3.89E-04 | 6.61E-03 |
| PTK2B        | 2185      | -0.361 | 2.66E-04 | 5.49E-03 |
| LOC728728    | 728728    | -0.361 | 6.76E-04 | 8.72E-03 |
| HIPK2        | 28996     | -0.359 | 4.27E-05 | 2.44E-03 |
| LOC399744    | 399744    | -0.358 | 8.29E-06 | 1.57E-03 |
| SLC11A1      | 6556      | -0.357 | 7.27E-04 | 9.01E-03 |
| VAV1         | 7409      | -0.356 | 3.09E-05 | 2.26E-03 |
| NCF4         | 4689      | -0.354 | 5.01E-04 | 7.67E-03 |
| B4GALT5      | 9334      | -0.353 | 6.18E-04 | 8.45E-03 |
| GPSM3        | 63940     | -0.352 | 2.14E-04 | 4.90E-03 |
| LOC100132491 | 100132491 | -0.352 | 1.36E-04 | 4.15E-03 |
| CCNJL        | 79616     | -0.352 | 2.64E-04 | 5.48E-03 |
| SOLH         | 6650      | -0.352 | 2.01E-04 | 4.77E-03 |
| XPO6         | 23214     | -0.352 | 7.18E-04 | 8.95E-03 |
| GRB2         | 2885      | -0.351 | 3.77E-05 | 2.36E-03 |
| PXN          | 5829      | -0.351 | 1.04E-05 | 1.57E-03 |
| CREBBP       | 1387      | -0.350 | 2.71E-04 | 5.53E-03 |
| SLC16A3      | 9123      | -0.349 | 8.20E-05 | 3.33E-03 |
| LOC642678    | 642678    | -0.349 | 1.65E-04 | 4.47E-03 |
| MICAL1       | 64780     | -0.348 | 1.03E-04 | 3.63E-03 |
| SEMA4B       | 10509     | -0.347 | 8.87E-05 | 3.44E-03 |

|              |           |        |          |          |
|--------------|-----------|--------|----------|----------|
| CECR1        | 51816     | -0.347 | 1.65E-04 | 4.47E-03 |
| MAP1LC3A     | 84557     | -0.347 | 3.85E-04 | 6.61E-03 |
| FAM119A      | 151194    | -0.347 | 6.70E-04 | 8.71E-03 |
| IP6K1        | 9807      | -0.346 | 9.54E-05 | 3.50E-03 |
| TACC3        | 10460     | -0.345 | 7.57E-06 | 1.52E-03 |
| MBP          | 4155      | -0.343 | 6.51E-04 | 8.64E-03 |
| LOC641996    | 641996    | -0.343 | 1.06E-04 | 3.63E-03 |
| EPN1         | 29924     | -0.343 | 1.37E-04 | 4.15E-03 |
| UNC93B1      | 81622     | -0.343 | 6.43E-04 | 8.58E-03 |
| NLRP12       | 91662     | -0.341 | 1.64E-04 | 4.47E-03 |
| TIMP1        | 7076      | -0.340 | 4.09E-05 | 2.41E-03 |
| ATP6V0D1     | 9114      | -0.340 | 2.25E-04 | 5.04E-03 |
| GAB2         | 9846      | -0.340 | 1.29E-04 | 4.04E-03 |
| ITPRIP       | 85450     | -0.340 | 2.81E-05 | 2.18E-03 |
| REPS2        | 9185      | -0.340 | 1.21E-04 | 3.84E-03 |
| NADK         | 65220     | -0.340 | 1.05E-04 | 3.63E-03 |
| CFP          | 5199      | -0.339 | 3.37E-05 | 2.31E-03 |
| ARAP3        | 64411     | -0.339 | 4.47E-05 | 2.47E-03 |
| WARS         | 7453      | -0.338 | 5.65E-05 | 2.72E-03 |
| MYO9B        | 4650      | -0.337 | 5.62E-04 | 8.01E-03 |
| ZNF577       | 84765     | -0.337 | 4.42E-04 | 7.12E-03 |
| LOC100134734 | 100134734 | -0.337 | 1.77E-04 | 4.50E-03 |
| TRIOBP       | 11078     | -0.333 | 4.04E-05 | 2.41E-03 |
| CD14         | 929       | -0.332 | 1.89E-04 | 4.63E-03 |
| N4BP1        | 9683      | -0.332 | 7.02E-05 | 3.07E-03 |
| TUBA1A       | 7846      | -0.331 | 3.69E-04 | 6.47E-03 |
| FAM63A       | 55793     | -0.329 | 8.78E-05 | 3.44E-03 |
| FERMT3       | 83706     | -0.328 | 1.67E-04 | 4.50E-03 |
| MLL4         | 9757      | -0.328 | 1.93E-04 | 4.66E-03 |
| CREB1        | 1385      | -0.328 | 6.42E-04 | 8.58E-03 |
| VPS37B       | 79720     | -0.327 | 3.32E-04 | 6.09E-03 |
| MKNK2        | 2872      | -0.327 | 1.49E-04 | 4.31E-03 |
| MGC26356     | 642280    | -0.326 | 7.22E-05 | 3.14E-03 |
| SBNO2        | 22904     | -0.326 | 1.46E-04 | 4.29E-03 |
| TALDO1       | 6888      | -0.325 | 9.48E-05 | 3.49E-03 |
| RENBP        | 5973      | -0.324 | 1.61E-04 | 4.47E-03 |
| ITGAM        | 3684      | -0.322 | 3.92E-04 | 6.66E-03 |
| CSK          | 1445      | -0.322 | 8.58E-05 | 3.40E-03 |
| SH2D3C       | 10044     | -0.322 | 3.08E-04 | 5.92E-03 |
| CREBBP       | 1387      | -0.322 | 1.88E-04 | 4.60E-03 |
| CHST15       | 51363     | -0.320 | 2.05E-04 | 4.81E-03 |
| HCLS1        | 3059      | -0.316 | 3.69E-05 | 2.34E-03 |
| PLEKHO2      | 80301     | -0.315 | 1.78E-04 | 4.53E-03 |
| SF3B4        | 10262     | -0.310 | 6.59E-04 | 8.67E-03 |

FGR

2268

-0.309

1.10E-04

3.63E-03
