# Supplementary material
Source: PubMed Central journal article supplement (PMC6084746)
Supplement: zsw019_suppl_table_s2.pdf [file zsw019_suppl_table_s2.pdf]

**Table S2.** List of enriched pathways in circulating leukocytes of monozygotic twin pairs with discordant sleep durations. False Discovery Rate (FDR) cutoff of < 0.05 was used to designate significance.

| <b>Gene Sets Up-regulated in Shorter Sleep Duration</b>                        | <b>Number of member genes</b> | <b>FDR</b> |
|--------------------------------------------------------------------------------|-------------------------------|------------|
| KEGG_RIBOSOME                                                                  | 78                            | 0          |
| REACTOME_SRP_DEPENDENT_COTRANSLATIONAL_PROTEIN_TARGETING_TO_MEMBRANE           | 101                           | 0          |
| REACTOME_PEPTIDE_CHAIN_ELONGATION                                              | 80                            | 0          |
| REACTOME_TRANSLATION                                                           | 130                           | 0          |
| REACTOME_3_UTR_MEDIATED_TRANSLATIONAL_REGULATION                               | 96                            | 0          |
| REACTOME_INFLUENZA_VIRAL_RNA_TRANSCRIPTION_AND_REPLICATION                     | 89                            | 0          |
| REACTOME_INFLUENZA_LIFE_CYCLE                                                  | 112                           | 0          |
| REACTOME_NONSENSE_MEDIATED_DECAY_ENHANCED_BY_THE_EXON_JUNCTION_COMPLEX         | 96                            | 0          |
| REACTOME_METABOLISM_OF_RNA                                                     | 197                           | 0          |
| REACTOME_ACTIVATION_OF_THE_MRNA_UPON_BINDING_OF_THE_CAP_BINDING_COMPLEX        | 50                            | 0          |
| REACTOME_FORMATION_OF_THE_TERNARY_COMPLEX_AND_SUBSEQUENTLY_THE_43S_COMPLEX     | 43                            | 0          |
| REACTOME_METABOLISM_OF_MRNA                                                    | 173                           | 0          |
| REACTOME_METABOLISM_OF_PROTEINS                                                | 258                           | 0          |
| REACTOME_RESPIRATORY_ELECTRON_TRANSPORT_ATP_SYNTHESIS_BY_CHEMIOSMOTIC_COUPLING | 63                            | 0          |
| REACTOME_RESPIRATORY_ELECTRON_TRANSPORT                                        | 49                            | 0          |
| KEGG_OXIDATIVE_PHOSPHORYLATION                                                 | 80                            | 0.009      |
| REACTOME_TCA_CYCLE_AND_RESPIRATORY_ELECTRON_TRANSPORT                          | 87                            | 0.009      |
| KEGG_PARKINSONS_DISEASE                                                        | 77                            | 0.023      |
| REACTOME_METABOLISM_OF_NON_CODING_RNA                                          | 26                            | 0.025      |
| KEGG_RNA_DEGRADATION                                                           | 40                            | 0.037      |
| <b>Gene Sets Down-regulated in Shorter Sleep Duration</b>                      | <b>Number of member genes</b> | <b>FDR</b> |
| KEGG_FC_GAMMA_R_MEDIATED_PHAGOCYTOSIS                                          | 59                            | 0          |
| KEGG_REGULATION_OF_ACTIN_CYTOSKELETON                                          | 88                            | 0          |
| KEGG_LEUKOCYTE_TRANSENDOTHELIAL_MIGRATION                                      | 55                            | 0          |
| KEGG_FC_EPSILON_RI_SIGNALING_PATHWAY                                           | 36                            | 0          |
| REACTOME_INTERFERON_ALPHA_BETA_SIGNALING                                       | 44                            | 0          |
| REACTOME_IL_3_5_AND_GM-CSF_SIGNALING                                           | 26                            | 0          |
| KEGG_FOCAL_ADHESION                                                            | 69                            | 0          |
| REACTOME_INTEGRIN_CELL_SURFACE_INTERACTIONS                                    | 35                            | 0          |
| PID_AMB2_NEUTROPHILS_PATHWAY                                                   | 21                            | 0          |
| PID_ALPHASYNUCLEIN_PATHWAY                                                     | 22                            | 0          |
| REACTOME_SEMAPHORIN_INTERACTIONS                                               | 34                            | 0          |
| REACTOME_SIGNALING_BY_SCF_KIT                                                  | 47                            | 0          |
| REACTOME_REGULATION_OF_SIGNALING_BY_CBL                                        | 13                            | 0          |
| ST_INTEGRIN_SIGNALING_PATHWAY                                                  | 39                            | 0          |
| PID_RHOA_REG_PATHWAY                                                           | 21                            | 0.001      |
| KEGG_CHEMOKINE_SIGNALING_PATHWAY                                               | 91                            | 0.001      |
| REACTOME_REGULATION_OF_KIT_SIGNALING                                           | 10                            | 0.001      |
| PID_FGF_PATHWAY                                                                | 24                            | 0.001      |
| ST_B_CELL_ANTIGEN_RECEPTOR                                                     | 27                            | 0.001      |
| REACTOME_EXTRACELLULAR_MATRIX_ORGANIZATION                                     | 13                            | 0.001      |
| PID_PTP1BPATHWAY                                                               | 27                            | 0.001      |
| REACTOME_PLATELET_ACTIVATION_SIGNALING_AND_AGGREGATION                         | 109                           | 0.001      |
| REACTOME_DEVELOPMENTAL_BIOLOGY                                                 | 151                           | 0.001      |
| PID_P38ALPHABETAPATHWAY                                                        | 20                            | 0.001      |
| BIOCARTA_INTEGRIN_PATHWAY                                                      | 25                            | 0.001      |
| PID_KITPATHWAY                                                                 | 31                            | 0.002      |
| REACTOME_GPVI_MEDIATED_ACTIVATION_CASCADE                                      | 21                            | 0.002      |
| SIG_BCR_SIGNALING_PATHWAY                                                      | 31                            | 0.004      |
| REACTOME_AXON_GUIDANCE                                                         | 94                            | 0.005      |
| PID_RAC1_PATHWAY                                                               | 33                            | 0.005      |
| PID_RETINOIC_ACID_PATHWAY                                                      | 19                            | 0.005      |
| REACTOME_IL_2_SIGNALING                                                        | 26                            | 0.005      |
| REACTOME_HEMOSTASIS                                                            | 209                           | 0.005      |
| PID_GMCSF_PATHWAY                                                              | 27                            | 0.005      |

|                                                                            |    |       |
|----------------------------------------------------------------------------|----|-------|
| REACTOME_SEMA4D_IN_SEMAPHORIN_SIGNALING                                    | 16 | 0.005 |
| SA_PTEN_PATHWAY                                                            | 10 | 0.007 |
| PID_EPOPATHWAY                                                             | 24 | 0.007 |
| ST_ERK1_ERK2_MAPK_PATHWAY                                                  | 20 | 0.007 |
| REACTOME_GROWTH_HORMONE_RECEPTOR_SIGNALING                                 | 14 | 0.007 |
| PID_THROMBIN_PAR1_PATHWAY                                                  | 26 | 0.008 |
| REACTOME_PLATELET_AGGREGATION_PLUG_FORMATION                               | 21 | 0.009 |
| PID_TCPTP_PATHWAY                                                          | 22 | 0.009 |
| SA_B_CELL_RECEPTOR_COMPLEXES                                               | 15 | 0.012 |
| PID_VEGFR1_2_PATHWAY                                                       | 43 | 0.012 |
| BIOCARTA_ERK5_PATHWAY                                                      | 12 | 0.012 |
| PID_INTEGRIN2_PATHWAY                                                      | 14 | 0.012 |
| BIOCARTA_IL2_PATHWAY                                                       | 15 | 0.013 |
| PID_IL6_7PATHWAY                                                           | 29 | 0.013 |
| ST_DIFFERENTIATION_PATHWAY_IN_PC12_CELLS                                   | 21 | 0.013 |
| REACTOME_INTEGRIN_ALPHAIIB_BETA3_SIGNALING                                 | 17 | 0.014 |
| REACTOME_RESPONSE_TO_ELEVATED_PLATELET_CYTOSOLIC_CA2_                      | 43 | 0.014 |
| REACTOME_IL_RECEPTOR_SHC_SIGNALING                                         | 14 | 0.015 |
| PID_IL8CXCR2_PATHWAY                                                       | 27 | 0.017 |
| KEGG_ADHERENS_JUNCTION                                                     | 33 | 0.017 |
| KEGG_B_CELL_RECEPTOR_SIGNALING_PATHWAY                                     | 51 | 0.017 |
| BIOCARTA_NKCELLS_PATHWAY                                                   | 14 | 0.017 |
| PID_IL8CXCR1_PATHWAY                                                       | 21 | 0.018 |
| REACTOME_INTERFERON_GAMMA_SIGNALING                                        | 44 | 0.018 |
| BIOCARTA_HER2_PATHWAY                                                      | 12 | 0.018 |
| PID_IFNGPATHWAY                                                            | 29 | 0.019 |
| BIOCARTA_IL6_PATHWAY                                                       | 15 | 0.019 |
| BIOCARTA_IL2RB_PATHWAY                                                     | 27 | 0.019 |
| SIG_IL4RECEPTOR_IN_B_LYPHOCYTES                                            | 16 | 0.019 |
| REACTOME_CD28_DEPENDENT_VAV1_PATHWAY                                       | 9  | 0.02  |
| BIOCARTA_GH_PATHWAY                                                        | 16 | 0.02  |
| REACTOME_SIGNALING_BY_ILS                                                  | 67 | 0.02  |
| REACTOME_SEMA4D_INDUCED_CELL_MIGRATION_AND_GROWTH_CONE_COLLAPSE            | 12 | 0.02  |
| KEGG_JAK_STAT_SIGNALING_PATHWAY                                            | 57 | 0.02  |
| BIOCARTA_EPO_PATHWAY                                                       | 13 | 0.02  |
| PID_CXCR4_PATHWAY                                                          | 69 | 0.021 |
| REACTOME_SEMA3A_PLEXIN_REPULSION_SIGNALING_BY_INHIBITING_INTEGRIN_ADHESION | 5  | 0.022 |
| KEGG_NATURAL_KILLER_CELL_MEDIATED_CYTOTOXICITY                             | 75 | 0.025 |
| BIOCARTA_IL3_PATHWAY                                                       | 10 | 0.026 |
| KEGG_CYTOKINE_CYTOKINE_RECEPTOR_INTERACTION                                | 81 | 0.026 |
| PID_PDGFBRBPATHWAY                                                         | 86 | 0.027 |
| KEGG_NON_SMALL_CELL_LUNG_CANCER                                            | 33 | 0.028 |
| PID_MET_PATHWAY                                                            | 48 | 0.028 |
| KEGG_TIGHT_JUNCTION                                                        | 45 | 0.028 |
| PID_SYNDECAN_4_PATHWAY                                                     | 16 | 0.029 |
| BIOCARTA_ECM_PATHWAY                                                       | 17 | 0.029 |
| KEGG_COMPLEMENT_AND_COAGULATION_CASCADES                                   | 16 | 0.029 |
| PID_FCR1PATHWAY                                                            | 44 | 0.029 |
| REACTOME_ANTIGEN_ACTIVATES_B_CELL_RECEPTOR                                 | 26 | 0.029 |
| SA_MMP_CYTOKINE_CONNECTION                                                 | 10 | 0.029 |
| BIOCARTA_PML_PATHWAY                                                       | 11 | 0.03  |
| REACTOME_SIGNALING_BY_RHO_GTPASES                                          | 53 | 0.03  |
| PID_ILK_PATHWAY                                                            | 28 | 0.03  |
| PID_IL4_2PATHWAY                                                           | 37 | 0.03  |
| REACTOME_DEGRADATION_OF_THE_EXTRACELLULAR_MATRIX                           | 7  | 0.03  |
| PID_MAPKTRKPATHWAY                                                         | 23 | 0.03  |
| KEGG_AXON_GUIDANCE                                                         | 45 | 0.031 |
| PID_ECADHERIN_KERATINOCYTE_PATHWAY                                         | 10 | 0.031 |
| SIG_PIP3_SIGNALING_IN_B_LYMPHOCYTES                                        | 22 | 0.032 |
| BIOCARTA_RARRXR_PATHWAY                                                    | 11 | 0.033 |
| REACTOME_RORA_ACTIVATES_CIRCADIAN_EXPRESSION                               | 16 | 0.033 |

|                                                                        |     |       |
|------------------------------------------------------------------------|-----|-------|
| REACTOME_CELL_SURFACE_INTERACTIONS_AT_THE_VASCULAR_WALL                | 44  | 0.033 |
| REACTOME_L1CAM_INTERACTIONS                                            | 34  | 0.033 |
| PID_ECADHERIN_STABILIZATION_PATHWAY                                    | 17  | 0.034 |
| PID_AVB3_OPN_PATHWAY                                                   | 20  | 0.034 |
| BIOCARTA_BIOPEPTIDES_PATHWAY                                           | 25  | 0.034 |
| KEGG_INOSITOL_PHOSPHATE_METABOLISM                                     | 23  | 0.036 |
| BIOCARTA_MAPK_PATHWAY                                                  | 57  | 0.036 |
| PID_CXCR3PATHWAY                                                       | 24  | 0.036 |
| REACTOME_CIRCADIAN_REPRESSION_OF_EXPRESSION_BY_REV_ERBA                | 15  | 0.037 |
| BIOCARTA_BARRESTIN_SRC_PATHWAY                                         | 10  | 0.038 |
| PID_EPHA_FWDPATHWAY                                                    | 16  | 0.039 |
| PID_INTEGRIN_CS_PATHWAY                                                | 11  | 0.039 |
| PID_LYMPHANGIOGENESIS_PATHWAY                                          | 14  | 0.04  |
| KEGG_MELANOGENESIS                                                     | 30  | 0.04  |
| BIOCARTA_CARM1_PATHWAY                                                 | 8   | 0.04  |
| REACTOME_CYTOKINE_SIGNALING_IN_IMMUNE_SYSTEM                           | 173 | 0.04  |
| REACTOME_YAP1_AND_WWTR1_TAZ_STIMULATED_GENE_EXPRESSION                 | 11  | 0.041 |
| BIOCARTA_GRANULOCYTES_PATHWAY                                          | 8   | 0.041 |
| KEGG_SULFUR_METABOLISM                                                 | 8   | 0.041 |
| PID_RHOA_PATHWAY                                                       | 24  | 0.041 |
| PID_UPA_UPAR_PATHWAY                                                   | 14  | 0.041 |
| PID_NCADHERINPATHWAY                                                   | 16  | 0.041 |
| BIOCARTA_CREB_PATHWAY                                                  | 14  | 0.041 |
| REACTOME_SIGNALING_BY_FGFR_IN_DISEASE                                  | 56  | 0.042 |
| BIOCARTA_PYK2_PATHWAY                                                  | 22  | 0.043 |
| ST_G_ALPHA_I_PATHWAY                                                   | 13  | 0.044 |
| PID_ERBB1_RECEPTOR_PROXIMAL_PATHWAY                                    | 25  | 0.044 |
| REACTOME_TRANSCRIPTIONAL_REGULATION_OF_WHITE_ADIPOCYTE_DIFFERENTIATION | 37  | 0.049 |
| BIOCARTA_UCALPAIN_PATHWAY                                              | 11  | 0.049 |
