# Supplementary material
Source: PubMed Central journal article supplement (PMC6084746)
Supplement: zsw019_suppl_table_s3.pdf [file zsw019_suppl_table_s3.pdf]

**Table S3.** List of enriched pathways in circulating mononuclear cells of subjects during partial sleep restriction. False Discovery Rate (FDR) cutoff of < 0.15 was used to designate significance\*.

| <b>Gene Sets Up-regulated in Acute Sleep Restriction</b>    | <b>Number of member genes</b> | <b>FDR</b> |
|-------------------------------------------------------------|-------------------------------|------------|
| BIOCARTA_HUMAN_CMV_PATHWAY                                  | 16                            | 0.004      |
| PID_IL6_7PATHWAY                                            | 46                            | 0.01       |
| BIOCARTA_TOLL_PATHWAY                                       | 36                            | 0.04       |
| PID_BCR_5PATHWAY                                            | 65                            | 0.055      |
| REACTOME_MRNA_3_END_PROCESSING                              | 31                            | 0.107      |
| REACTOME_TOLL_RECEPTOR_CASCADES                             | 112                           | 0.115      |
| REACTOME_INFLAMMASOMES                                      | 15                            | 0.115      |
| REACTOME_CLEAVAGE_OF_GROWING_TRANSCRIPT                     | 40                            | 0.118      |
| PID_MYC_PATHWAY                                             | 25                            | 0.119      |
| REACTOME_IL_6_SIGNALING                                     | 10                            | 0.121      |
| BIOCARTA_IL3_PATHWAY                                        | 15                            | 0.126      |
| BIOCARTA_IL6_PATHWAY                                        | 22                            | 0.127      |
| BIOCARTA_BLYMPHOCYTE_PATHWAY                                | 11                            | 0.127      |
| BIOCARTA_GLEEVEC_PATHWAY                                    | 23                            | 0.129      |
| BIOCARTA_VIP_PATHWAY                                        | 24                            | 0.13       |
| REACTOME_SIGNAL_REGULATORY_PROTEIN_SIRP_FAMILY_INTERACTIONS | 12                            | 0.133      |
| BIOCARTA_PPARA_PATHWAY                                      | 56                            | 0.134      |
| REACTOME_TRAF6_MEDIATED_INDUCTION_OF_TAK1_COMPLEX           | 13                            | 0.139      |
| REACTOME_INTERFERON_ALPHA_BETA_SIGNALING                    | 62                            | 0.142      |
| <b>Gene Sets Down-regulated in Acute Sleep Restriction</b>  | <b>Number of member genes</b> | <b>FDR</b> |
| KEGG_GRAFT_VERSUS_HOST_DISEASE                              | 37                            | 0.084      |
| KEGG_ANTIGEN_PROCESSING_AND_PRESENTATION                    | 81                            | 0.099      |
| KEGG_NATURAL_KILLER_CELL_MEDIATED_CYTOTOXICITY              | 130                           | 0.104      |

\*Microarray data from Aho V, Ollila HM, Rantanen V, et al. PLoS One 2013;8:e77184.
